# Supplementary material for: Composition of the Cockroach Gut Microbiome in the Presence of Parasitic Nematodes
Source: PubMed Central journal article supplement (PMC5017809; doi:10.1264/jsme2.me16088), 2016-08-11
Supplement: 31_314_s1.pdf [file 31_314_s1.pdf]

Table S1 – Weight of cockroach gut sections with and without parasitic nematodes (La, *Leidynema appendiculatum*; Free, nematode-free; Hd, *Hammerschmidtella diesingi*; Tb, *Thelastoma bulhoesi*).

| Host                          | Nematode  | Gut section | Average (mg) | Standard dev. |
|-------------------------------|-----------|-------------|--------------|---------------|
| <i>Periplaneta fuliginosa</i> | La        | Foregut     | 18.93        | 17.00         |
|                               |           | Midgut      | 12.33        | 0.80          |
|                               |           | Hindgut     | 37.67        | 44.45         |
|                               | Free      | Foregut     | 13.17        | 5.86          |
|                               |           | Midgut      | 32.47        | 21.97         |
|                               |           | Hindgut     | 11.13        | 6.70          |
| <i>Periplaneta americana</i>  | Hd and Tb | Hindgut     | 16.07        | 6.26          |
|                               | La        |             | 18.53        | 8.62          |
|                               | Free      |             | 20.75        | 6.58          |

**Table S2 – List of primers used in this study. Bold region highlighted in 16S V3–V4 region primers indicate the Illumina overhang adapter sequences.**

|                                                                                                                                                                          |
|--------------------------------------------------------------------------------------------------------------------------------------------------------------------------|
| Primers (5'-3')                                                                                                                                                          |
| <i>Leidynema appendiculatum</i> specific primer based in D2D3 region<br>Forward GCTGGTTGCCAGGCTCTACTAC<br>Reverse CCGCACCACCGCAGGCCAGCAT                                 |
| <i>Hammerschmidtella diesingi</i> specific primer based in D2D3 region<br>Forward TGGCTGGATGGCTGTACTACTG<br>Reverse GCATCATCAGACGAGCCAACAC                               |
| <i>Thelastoma bulhoesi</i> specific primer based in D2D3 region<br>Forward GTCATGTTGCTGACTGCTTCC<br>Reverse GCACCACCAAACGGGCTAACGC                                       |
| <b>16S V3-V4 region</b><br>Forward <b>TCGTCGGCAGCGTCAGATGTGTATAAGAGACAG</b> CCTACGGGNGGCWGCAG<br>Reverse <b>GTCTCGTGGGCTCGGAGATGTGTATAAGAGACAG</b> GACTACHVGGGTATCTAATCC |

Table S3 – Characteristics of 16S rRNA gene amplicons from *Periplaneta fuliginosa* and *P. americana* with and without parasitic nematodes (La, *Leidynema appendiculatum*; Hd, *Hammerschmidtella diesingi*; Tb, *Thelastoma bulhoesi*)

| Libraries | Accession  | Gut Section | # Raw Pairs | % Trimmed Pairs | % Joined Pairs | % Cleaned Pairs | Mean Length | Pyrotags <sup>1</sup> |
|-----------|------------|-------------|-------------|-----------------|----------------|-----------------|-------------|-----------------------|
| L1976     | SRR3178367 | Foregut     | 106,610     | 99.72           | 71.79          | 70.47           | 420         | 70819                 |
| L1977     | SRR3180601 | Midgut      | 114,524     | 99.70           | 67.72          | 66.75           | 421         | 73905                 |
| L1978     | SRR3180617 | Hindgut     | 113,967     | 99.67           | 68.89          | 65.83           | 416         | 67956                 |
| L1980     | SRR3186995 | Foregut     | 112,314     | 99.63           | 68.13          | 66.29           | 415         | 68331                 |
| L1981     | SRR3186996 | Midgut      | 110,814     | 99.61           | 68.07          | 66.44           | 418         | 69720                 |
| L1982     | SRR3186998 | Hindgut     | 109,556     | 99.57           | 69.03          | 65.06           | 411         | 65167                 |
| L1983     | SRR3225595 | Hindgut     | 111,834     | 99.61           | 63.97          | 60.28           | 406         | 56071                 |
| L1984     | SRR3225596 | Hindgut     | 115,686     | 99.67           | 69.74          | 66.07           | 414         | 59835                 |
| L1985     | SRR3225597 | Hindgut     | 113,802     | 99.64           | 68.86          | 64.80           | 413         | 69063                 |

<sup>1</sup>Number of pyrotags (sequences) per library after second quality-filtering

Table S4 – Genus abundance (%) for each library. The rarefaction level was 4528 sequences/library. The rarefaction level was 4,528 sequences in each library.

| Kingdom        | Phylum                    | Class               | Order               | Family                | Genus                 | <i>Periplaneta fuliginosa</i>  |                    |                       |                     |                   |        |        |        |        |        |       |
|----------------|---------------------------|---------------------|---------------------|-----------------------|-----------------------|--------------------------------|--------------------|-----------------------|---------------------|-------------------|--------|--------|--------|--------|--------|-------|
|                |                           |                     |                     |                       |                       | <i>Leidynea appendiculatum</i> |                    | <i>Free-nematode</i>  |                     |                   |        |        |        |        |        |       |
|                |                           |                     |                     |                       |                       | L1976                          | L1977              | L1978                 | L1980               | L1981             | L1982  |        |        |        |        |       |
| Archaea        | Euryarchaeota             | Methanomicrobia     | Methanosarcinales   | Methanosarcinaceae    | Methanoniemicrococcus | 0.00                           | 0.00               | 0.07                  | 0.00                | 0.00              | 0.00   |        |        |        |        |       |
|                |                           |                     | Acidimicrobia       | Acidimicrobiales      | Other                 | 0.00                           | 0.00               | 0.02                  | 0.20                | 0.00              | 0.00   |        |        |        |        |       |
|                |                           |                     | Other               | 0.00                  | 0.00                  | 0.00                           | 0.15               | 0.00                  | 0.00                |                   |        |        |        |        |        |       |
|                |                           |                     | Actinobacteria      | Actinobacteria        | Actinobacteria        | Actinomycetales                | Brevibacteriaceae  | Brevibacterium        | 4.37%               | 15.75%            | 0.75%  | 1.50%  | 1.46%  | 0.71%  |        |       |
|                |                           |                     |                     |                       |                       |                                | Celulomonadaceae   | 0.29%                 | 0.20%               | 0.00%             | 0.02%  | 0.02%  | 0.00%  |        |        |       |
|                |                           |                     |                     |                       |                       |                                | Corynebacteriaceae | Corynebacterium       | 1.46%               | 1.48%             | 0.09%  | 1.63%  | 0.04%  | 0.00%  |        |       |
|                |                           |                     |                     |                       |                       |                                | Dermabacteraceae   | Brachybacterium       | 1.17%               | 5.10%             | 0.22%  | 0.91%  | 0.07%  | 0.00%  |        |       |
|                |                           |                     |                     |                       |                       |                                | Dietziaceae        | 0.00%                 | 0.00%               | 0.00%             | 0.44%  | 0.27%  | 0.00%  |        |        |       |
|                |                           |                     |                     |                       |                       |                                | Glycomycetaceae    | Glycomyces            | 0.07%               | 0.29%             | 0.04%  | 0.46%  | 0.09%  | 0.00%  |        |       |
|                |                           |                     |                     |                       |                       |                                | Gordoniaceae       | Gordonia              | 3.16%               | 2.58%             | 0.29%  | 13.94% | 1.46%  | 0.04%  |        |       |
|                |                           |                     |                     |                       |                       |                                | Intrasporangiaceae | 0.04%                 | 0.11%               | 0.02%             | 0.09%  | 0.00%  | 0.00%  |        |        |       |
|                |                           |                     |                     |                       |                       |                                | Microbacteriaceae  | Aeromyces             | 0.09%               | 0.11%             | 0.04%  | 0.18%  | 0.09%  | 0.00%  |        |       |
|                |                           |                     |                     |                       |                       |                                |                    | Leucobacter           | 0.00%               | 0.02%             | 0.00%  | 0.38%  | 0.02%  | 0.04%  |        |       |
|                |                           |                     |                     |                       |                       |                                |                    | Microbacterium        | 0.04%               | 0.09%             | 0.00%  | 0.09%  | 0.02%  | 0.00%  |        |       |
|                |                           |                     |                     |                       |                       |                                |                    | Arthrobracter         | 0.04%               | 0.09%             | 0.00%  | 0.07%  | 0.00%  | 0.00%  |        |       |
|                |                           |                     |                     |                       |                       |                                |                    | Micrococcaceae        | 0.04%               | 0.09%             | 0.00%  | 0.29%  | 0.00%  | 0.00%  |        |       |
|                |                           |                     |                     |                       |                       |                                |                    | Mycobacteriaceae      | Mycobacterium       | 0.04%             | 0.04%  | 0.00%  | 5.08%  | 0.68%  | 0.07%  |       |
|                |                           |                     |                     |                       |                       |                                |                    | Norcardiaceae         | Rhodococcus         | 0.02%             | 0.07%  | 0.00%  | 0.31%  | 0.04%  | 0.00%  |       |
|                |                           |                     |                     |                       |                       |                                |                    | Norcardioidaceae      | 0.07%               | 0.66%             | 0.02%  | 0.11%  | 0.02%  | 0.00%  |        |       |
|                |                           |                     |                     |                       |                       |                                |                    | Aeromicrobium         | 0.00%               | 0.00%             | 0.00%  | 0.22%  | 0.00%  | 0.00%  |        |       |
|                |                           |                     |                     |                       |                       |                                |                    | Promicromonosporaceae | Cellulosimicrobium  | 0.09%             | 0.07%  | 0.00%  | 1.19%  | 0.02%  | 0.02%  |       |
|                |                           |                     |                     |                       |                       |                                |                    | Xylanimicrobium       | 1.63%               | 5.98%             | 0.40%  | 0.42%  | 0.00%  | 0.02%  |        |       |
|                |                           |                     |                     |                       |                       |                                |                    |                       | 0.00%               | 0.15%             | 0.02%  | 0.02%  | 0.07%  | 0.00%  |        |       |
|                |                           |                     |                     |                       |                       |                                |                    | Pseudonocardaceae     | Amycolatopsis       | 0.06%             | 0.00%  | 0.00%  | 0.09%  | 0.00%  | 0.00%  |       |
|                |                           |                     |                     |                       |                       |                                |                    |                       | Pseudonocardia      | 0.02%             | 0.09%  | 0.00%  | 0.24%  | 0.00%  | 0.00%  |       |
|                |                           |                     |                     |                       |                       |                                |                    |                       | Saccharopolyspora   | 0.00%             | 0.00%  | 0.00%  | 0.18%  | 0.29%  | 0.07%  |       |
|                |                           |                     |                     |                       |                       |                                |                    | Sanguibacteraceae     | Sanguibacter        | 0.11%             | 0.51%  | 0.04%  | 0.09%  | 0.02%  | 0.00%  |       |
|                |                           |                     |                     |                       |                       |                                |                    | Streptomycetaceae     | Streptomyces        | 0.18%             | 0.20%  | 0.00%  | 0.27%  | 0.02%  | 0.00%  |       |
|                |                           |                     |                     |                       |                       |                                |                    | Coriobacteriia        | Coriobacteriales    | Coriobacteriaceae | 0.02%  | 0.13%  | 0.11%  | 0.00%  | 0.04%  | 0.02% |
|                |                           |                     |                     |                       |                       |                                |                    | Thermoleophiia        | Solirubrobacterales | Other             | 0.00%  | 0.00%  | 0.00%  | 1.04%  | 0.13%  | 0.00% |
|                |                           |                     |                     |                       |                       |                                |                    |                       | Patulibacteraceae   | Patulibacter      | 0.00%  | 0.18%  | 0.02%  | 0.02%  | 0.07%  | 0.00% |
|                |                           |                     |                     |                       |                       |                                | Bacteroidetes      | Bacteroidetes         | Bacteroidia         | Bacteroidales     | Other  | 0.04%  | 0.07%  | 3.00%  | 0.00%  | 0.00% |
| Bacteroidaceae | Bacteroides               | 0.64%               |                     |                       |                       |                                |                    |                       |                     |                   | 0.93%  | 4.39%  | 0.18%  | 0.07%  | 26.02% |       |
|                | Candidatus Azobacteroides | 0.27%               |                     |                       |                       |                                |                    |                       |                     |                   | 0.29%  | 5.01%  | 0.00%  | 0.00%  | 0.00%  |       |
|                | Dysgonomonas              | 0.57%               |                     |                       |                       |                                |                    |                       |                     |                   | 0.66%  | 7.64%  | 0.18%  | 0.00%  | 4.68%  |       |
|                | Paludibacter              | 0.09%               | 0.18%               | 1.79%                 | 0.00%                 | 0.00%                          |                    |                       |                     |                   | 0.00%  |        |        |        |        |       |
|                | Parabacteroides           | 0.46%               | 0.33%               | 5.59%                 | 0.00%                 | 0.00%                          |                    |                       |                     |                   | 0.00%  |        |        |        |        |       |
|                | Tannerella                | 0.07%               | 0.00%               | 2.34%                 | 0.00%                 | 0.00%                          |                    |                       |                     |                   | 0.00%  |        |        |        |        |       |
|                | Rikenellaceae             | Rikenella           | 0.42%               | 0.68%                 | 6.49%                 | 0.04%                          |                    |                       |                     |                   | 0.00%  | 1.21%  |        |        |        |       |
|                | Odoribacteraceae          | Butyrivimonas       | 0.00%               | 0.00%                 | 0.13%                 | 0.00%                          |                    |                       |                     |                   | 0.00%  | 0.00%  |        |        |        |       |
|                |                           | Odoribacter         | 0.04%               | 0.11%                 | 1.24%                 | 0.04%                          |                    |                       |                     |                   | 0.00%  | 0.00%  |        |        |        |       |
|                | Cytophagia                | Cytophagaceae       | 0.40%               | 0.27%                 | 0.09%                 | 0.15%                          |                    |                       |                     |                   | 0.07%  | 0.00%  |        |        |        |       |
|                | Flavobacteriia            | Flavobacteriales    | Blattabacteriaceae  | 0.00%                 | 0.00%                 | 0.02%                          |                    |                       |                     |                   | 1.19%  | 0.00%  | 0.00%  |        |        |       |
|                | Flavobacteriia            | Flavobacteriales    | Flavobacteriaceae   | 0.00%                 | 0.00%                 | 0.00%                          |                    |                       |                     |                   | 0.35%  | 0.00%  | 0.00%  |        |        |       |
|                | Flavobacteriia            | Flavobacteriales    | Weeksliaceae        | 0.13%                 | 0.29%                 | 0.00%                          |                    |                       |                     |                   | 11.97% | 0.02%  | 0.00%  |        |        |       |
|                | Sphingobacteriia          | Sphingobacteriales  | Sphingobacteriaceae | 0.53%                 | 0.95%                 | 0.15%                          |                    |                       |                     |                   | 3.22%  | 0.00%  | 0.00%  |        |        |       |
|                | Sphingobacteriia          | Sphingobacteriales  | Sphingobacteriaceae | 0.15%                 | 0.46%                 | 0.09%                          |                    |                       |                     |                   | 1.74%  | 0.07%  | 0.02%  |        |        |       |
|                | Saprospirae               | Saprospirales       | Chitinophagaceae    | 1.13%                 | 0.42%                 | 0.07%                          |                    |                       |                     |                   | 1.50%  | 0.00%  | 0.00%  |        |        |       |
|                | Chloroflexi               | Thermomicrobia      | AKG1722             | 0.07%                 | 0.00%                 | 0.00%                          |                    |                       |                     |                   | 0.62%  | 0.00%  | 0.00%  |        |        |       |
|                | Chloroflexi               | Thermomicrobia      | UG30-KF-045         | 0.04%                 | 0.33%                 | 0.00%                          |                    |                       |                     |                   | 2.15%  | 0.31%  | 0.02%  |        |        |       |
|                | Cyanobacteria             | Chloroplast         | Streptophyta        | 0.00%                 | 0.02%                 | 0.00%                          |                    |                       |                     |                   | 0.04%  | 0.02%  | 0.00%  |        |        |       |
|                | Deferribacteres           | Deferribacteres     | Deferribacteriales  | Deferribacteraceae    | Mucispirillum         | 0.00%                          |                    |                       |                     |                   | 0.00%  | 0.66%  | 0.00%  | 0.00%  |        |       |
|                | Firmicutes                | Bacilli             | Bacillales          | Bacillaceae           | 0.00%                 | 0.11%                          |                    |                       |                     |                   | 0.00%  | 1.10%  | 0.02%  | 0.00%  |        |       |
|                | Firmicutes                | Bacilli             | Bacillales          | Bacillaceae           | 0.93%                 | 0.04%                          |                    |                       |                     |                   | 0.02%  | 0.00%  | 0.00%  | 0.00%  |        |       |
|                | Firmicutes                | Bacilli             | Bacillales          | Paenibacillaceae      | Paenibacillus         | 0.02%                          |                    |                       |                     |                   | 0.00%  | 0.00%  | 0.18%  | 0.00%  | 0.04%  |       |
|                | Firmicutes                | Bacilli             | Bacillales          | Planococcaceae        | 0.17%                 | 0.75%                          |                    |                       |                     |                   | 0.04%  | 0.31%  | 0.44%  | 0.04%  |        |       |
|                | Firmicutes                | Bacilli             | Bacillales          | Planococcaceae        | 0.04%                 | 0.04%                          |                    |                       |                     |                   | 0.00%  | 0.11%  | 0.00%  | 0.00%  |        |       |
|                | Firmicutes                | Bacilli             | Bacillales          | Staphylococcaceae     | Jeotgaliococcus       | 0.18%                          |                    |                       |                     |                   | 0.31%  | 0.00%  | 0.13%  | 0.00%  | 0.04%  |       |
|                | Firmicutes                | Bacilli             | Bacillales          | Staphylococcaceae     | Staphylococcus        | 12.74%                         |                    |                       |                     |                   | 11.97% | 0.46%  | 2.34%  | 5.65%  | 0.97%  |       |
|                | Firmicutes                | Bacilli             | Lactobacillales     | Other                 | 22.13%                | 12.72%                         |                    |                       |                     |                   | 1.28%  | 6.65%  | 9.70%  | 0.99%  |        |       |
|                | Firmicutes                | Bacilli             | Lactobacillales     | Enterococcaceae       | Enterococcus          | 1.02%                          |                    |                       |                     |                   | 1.68%  | 0.84%  | 1.57%  | 10.40% | 4.00%  |       |
|                | Firmicutes                | Bacilli             | Lactobacillales     | Lactobacillaceae      | 0.13%                 | 5.98%                          |                    |                       |                     |                   | 1.24%  | 0.00%  | 0.00%  | 0.00%  |        |       |
|                | Firmicutes                | Bacilli             | Lactobacillales     | Lactobacillaceae      | 19.63%                | 13.01%                         |                    |                       |                     |                   | 1.06%  | 15.44% | 16.83% | 1.90%  |        |       |
|                | Firmicutes                | Bacilli             | Lactobacillales     | Lactobacillaceae      | Pediococcus           | 0.35%                          | 0.13%              | 0.00%                 | 0.02%               | 0.00%             | 0.00%  |        |        |        |        |       |
|                | Firmicutes                | Clostridia          | Clostridiales       | 0.27%                 | 0.31%                 | 3.03%                          | 0.11%              | 0.07%                 | 4.42%               |                   |        |        |        |        |        |       |
|                | Firmicutes                | Clostridia          | Clostridiales       | Christensenellaceae   | 0.09%                 | 0.29%                          | 3.25%              | 0.15%                 | 0.29%               | 5.30%             |        |        |        |        |        |       |
|                | Firmicutes                | Clostridia          | Clostridiales       | Clostridiaceae        | 0.00%                 | 0.02%                          | 0.15%              | 0.00%                 | 0.02%               | 1.26%             |        |        |        |        |        |       |
|                | Firmicutes                | Clostridia          | Clostridiales       | Clostridiaceae        | 0.02%                 | 0.15%                          | 0.00%              | 0.02%                 | 0.11%               | 0.00%             |        |        |        |        |        |       |
|                | Firmicutes                | Clostridia          | Clostridiales       | Dehalobacteriaceae    | 0.00%                 | 0.00%                          | 0.00%              | 0.00%                 | 0.00%               | 0.11%             |        |        |        |        |        |       |
|                | Firmicutes                | Clostridia          | Clostridiales       | Dehalobacteriaceae    | Dehalobacterium       | 0.00%                          | 0.00%              | 0.04%                 | 0.00%               | 0.00%             |        |        |        |        |        |       |
|                | Firmicutes                | Clostridia          | Clostridiales       | Eubacteriaceae        | Anaerofustis          | 0.02%                          | 0.04%              | 0.00%                 | 0.00%               | 0.00%             |        |        |        |        |        |       |
|                | Firmicutes                | Clostridia          | Clostridiales       | Eubacteriaceae        | Eubacterium           | 0.02%                          | 0.02%              | 0.00%                 | 0.00%               | 0.00%             |        |        |        |        |        |       |
|                | Firmicutes                | Clostridia          | Clostridiales       | Lachnospiraceae       | 0.02%                 | 0.00%                          | 0.20%              | 0.04%                 | 0.00%               | 0.24%             |        |        |        |        |        |       |
|                | Firmicutes                | Clostridia          | Clostridiales       | Lachnospiraceae       | 0.53%                 | 0.38%                          | 2.45%              | 0.33%                 | 16.74%              | 10.27%            |        |        |        |        |        |       |
|                | Firmicutes                | Clostridia          | Clostridiales       | Lachnospiraceae       | Caprococcus           | 0.00%                          | 0.00%              | 0.13%                 | 0.00%               | 0.00%             |        |        |        |        |        |       |
|                | Firmicutes                | Clostridia          | Clostridiales       | Peptostreptococcaceae | 0.07%                 | 0.84%                          | 0.04%              | 0.75%                 | 1.97%               | 0.02%             |        |        |        |        |        |       |
|                | Firmicutes                | Clostridia          | Clostridiales       | Ruminococcaceae       | 0.00%                 | 0.00%                          | 0.09%              | 0.00%                 | 0.00%               | 0.04%             |        |        |        |        |        |       |
|                | Firmicutes                | Clostridia          | Clostridiales       | Ruminococcaceae       | 0.42%                 | 0.57%                          | 6.12%              | 0.84%                 | 3.58%               | 16.50%            |        |        |        |        |        |       |
|                | Firmicutes                | Clostridia          | Clostridiales       | Ruminococcaceae       | 0.00%                 | 0.00%                          | 0.09%              | 0.00%                 | 0.00%               | 0.15%             |        |        |        |        |        |       |
|                | Firmicutes                | Clostridia          | Clostridiales       | Ruminococcaceae       | Oscillospira          | 0.02%                          | 0.02%              | 0.57%                 | 0.13%               | 0.24%             | 3.98%  |        |        |        |        |       |
|                | Firmicutes                | Clostridia          | Clostridiales       | Ruminococcaceae       | Ruminococcus          | 0.00%                          | 0.04%              | 0.40%                 | 0.00%               | 0.49%             | 2.12%  |        |        |        |        |       |
|                | Firmicutes                | Clostridia          | Clostridiales       | Veillonellaceae       | 0.02%                 | 0.09%                          | 0.64%              | 0.00%                 | 0.00%               | 0.00%             |        |        |        |        |        |       |
|                | Firmicutes                | Clostridia          | Clostridiales       | Mogibacteriaceae      | 0.02%                 | 0.00%                          | 0.07%              | 0.00%                 | 0.00%               | 0.00%             |        |        |        |        |        |       |
|                | Firmicutes                | Clostridia          | Clostridiales       | Mogibacteriaceae      | 0.04%                 | 0.04%                          | 0.20%              | 0.00%                 | 0.02%               | 0.07%             |        |        |        |        |        |       |
|                | Firmicutes                | Clostridia          | Clostridiales       | Mogibacteriaceae      | 0.00%                 | 0.02%                          | 0.02%              | 0.00%                 | 0.00%               | 0.00%             |        |        |        |        |        |       |
|                | Firmicutes                | Clostridia          | Clostridiales       | SHA-98                | 0.00%                 | 0.00%                          | 0.04%              | 0.02%                 | 0.00%               | 0.24%             |        |        |        |        |        |       |
|                | Firmicutes                | Erysipelotrichi     | Erysipelotrichales  | Erysipelotrichaceae   | 0.60%                 | 0.40%                          | 1.30%              | 0.04%                 | 2.80%               | 3.25%             |        |        |        |        |        |       |
|                | Fusobacteria              | Fusobacteriia       | Fusobacteriales     | Fusobacteriaceae      | 0.00%                 | 0.00%                          | 0.22%              | 0.00%                 | 0.00%               | 0.00%             |        |        |        |        |        |       |
|                | Fusobacteria              | Fusobacteriia       | Fusobacteriales     | Fusobacteriaceae      | Fusobacterium         | 0.42%                          | 0.09%              | 2.98%                 | 0.00%               | 0.00%             | 0.00%  |        |        |        |        |       |
|                | GNO2                      | BDI-5               | 0.02%               | 0.02%                 | 0.09%                 | 0.00%                          | 0.00%              | 0.00%                 | 0.00%               |                   |        |        |        |        |        |       |
|                | Planctomycetes            | Planctomycetia      | Gemmatales          | Isosphaeraceae        | 0.00%                 | 0.00%                          | 0.00%              | 0.04%                 | 0.00%               | 0.00%             |        |        |        |        |        |       |
|                | Planctomycetes            | Planctomycetia      | Pirellulales        | Pirellulaceae         | 0.00%                 | 0.02%                          | 0.02%              | 0.80%                 | 0.04%               | 0.02%             |        |        |        |        |        |       |
|                | Planctomycetes            | Planctomycetia      | Planctomycetales    | Planctomycetaceae     | Planctomycetes        | 0.07%                          | 0.09%              | 0.04%                 | 2.39%               | 0.11%             | 0.00%  |        |        |        |        |       |
|                | Planctomycetes            | vadinHA49           | PeH47               | 0.07%                 | 0.09%                 | 1.81%                          | 0.00%              | 0.00%                 | 0.00%               |                   |        |        |        |        |        |       |
|                | Proteobacteria            | Alphaproteobacteria | Caulobacterales     | Caulobacteraceae      | 0.00%                 | 0.00%                          | 0.00%              | 0.31%                 | 0.00%               | 0.00%             |        |        |        |        |        |       |
|                | Proteobacteria            | Alphaproteobacteria | Caulobacterales     | Caulobacteraceae      | Brevundimonas         | 0.40%                          | 0.53%              | 0.11%                 | 0.33%               | 0.00%             | 0.00%  |        |        |        |        |       |
|                | Proteobacteria            | Alphaproteobacteria | Rhizobiales         | 0.18%                 | 0.38%                 | 0.00%                          | 0.00%              | 0.00%                 | 0.00%               |                   |        |        |        |        |        |       |
|                | Proteobacteria            | Alphaproteobacteria | Rhizobiales         | Bradyrhizobiaceae     | 0.00%                 | 0.02%                          | 0.00%              | 0.07%                 | 0.00%               | 0.00%             |        |        |        |        |        |       |
|                | Proteobacteria            | Alphaproteobacteria | Rhizobiales         | Brucellaceae          | 0.04%                 | 0.86%                          | 0.02%              | 0.00%                 | 0.00%               | 0.00%             |        |        |        |        |        |       |
|                | Proteobacteria            | Alphaproteobacteria | Rhizobiales         | Bruceellaceae         | 0.22%                 | 2.32%                          | 0.07%              | 1.63%                 | 0.57%               | 0.07%             |        |        |        |        |        |       |
|                | Proteobacteria            | Alphaproteobacteria | Rhizobiales         | Hyphomicrobiaceae     | 0.51%                 | 0.51%                          | 0.13%              | 0.84%                 | 0.09%               | 0.00%             |        |        |        |        |        |       |
|                | Proteobacteria            | Alphaproteobacteria | Rhizobiales         | Phyllobacteriaceae    | 0.00%                 | 0.00%                          | 0.00%              | 0.04%                 | 0.00%               | 0.00%             |        |        |        |        |        |       |
|                | Proteobacteria            | Alphaproteobacteria | Rhizobiales         | Phyllobacteriaceae    | 0.09%                 | 0.31%                          | 0.02%              | 0.82%                 | 0.15%               | 0.02%             |        |        |        |        |        |       |
|                | Proteobacteria            | Alphaproteobacteria | Rhizobiales         | Rhizobiaceae          | 0.00%                 | 0.00%                          | 0.00%              | 0.07%                 | 0.13%               | 0.04%             |        |        |        |        |        |       |
|                | Proteobacteria            | Alphaproteobacteria | Rhodobacteriales    | Rhodobacteraceae      | 0.00%                 | 0.00%                          | 0.00%              | 0.02%                 | 0.00%               | 0.04%             |        |        |        |        |        |       |
|                | Proteobacteria            | Alphaproteobacteria | Rhodobacteriales    | Rhodobacteraceae      | Paracoccus            | 0.00%                          | 0.00%              | 0.00%                 | 0.51%               | 0.02%             | 0.00%  |        |        |        |        |       |
|                | Proteobacteria            | Alphaproteobacteria | Rickettsiales       | Rickettsiaceae        | 0.00%                 | 0.00%                          | 0.02%              | 0.00%                 | 0.00%               | 0.00%             |        |        |        |        |        |       |
|                | Proteobacteria            | Alphaproteobacteria | Rickettsiales       | Rickettsiaceae        | 0.02%                 | 0.00%                          | 0.00%              | 0.11%                 | 0.00%               | 0.00%             |        |        |        |        |        |       |
|                | Proteobacteria            | Alphaproteobacteria | Sphingomonadales    | Sphingomonadaceae     | 0.00%                 | 0.00%                          | 0.00%              | 0.11%                 | 0.00%               | 0.00%             |        |        |        |        |        |       |
|                | Proteobacteria            | Alphaproteobacteria | Sphingomonadales    | Sphingomonadaceae     | 0.00%                 | 0.00%                          | 0.00%              | 0.11%                 | 0.00%               | 0.00%             |        |        |        |        |        |       |
|                | Proteobacteria            | Alphaproteobacteria | Sphingomonadales    | Sphingomonadaceae     | Novosphingobium       | 0.09%                          | 0.09%              | 0.02%                 | 0.38%               | 0.00%             | 0.00%  |        |        |        |        |       |
|                | Proteobacteria            | Alphaproteobacteria | Sphingomonadales    | Sphingomonadaceae     | Sphingopyxis          | 0.27%                          | 0.18%              | 0.00%                 | 0.15%               | 0.00%             | 0.00%  |        |        |        |        |       |
|                | Proteobacteria            | Betaproteobacteria  | Burkholderiales     | Alcaligenaceae        | 0.31%                 | 0.33%                          | 0.02%              | 2.05%                 | 0.27%               | 0.02%             |        |        |        |        |        |       |
|                | Proteobacteria            | Betaproteobacteria  | Burkholderiales     | Alcaligenaceae        | 0.00%                 | 0.04%                          | 0.00%              | 0.07%                 | 0.02%               | 0.00%             |        |        |        |        |        |       |
|                | Proteobacteria            | Betaproteobacteria  | Burkholderiales     | Alcaligenaceae        | 0.02%                 | 0.60%                          |                    |                       |                     |                   |        |        |        |        |        |       |

|                 |                       |                    |                     |                  |       |       |        |       |        |       |
|-----------------|-----------------------|--------------------|---------------------|------------------|-------|-------|--------|-------|--------|-------|
| Proteobacteria  | Deltaproteobacteria   | Desulfobacterales  | Desulfurificaceae   | Desulfobulbus    | 0.02% | 0.02% | 0.97%  | 0.00% | 0.00%  | 0.00% |
| Proteobacteria  | Deltaproteobacteria   | Desulfobacterales  | Desulfovibrionaceae |                  | 0.38% | 0.80% | 19.79% | 0.09% | 2.05%  | 5.65% |
| Proteobacteria  | Deltaproteobacteria   | Desulfobacterales  | Desulfovibrionaceae | Desulfovibrio    | 0.00% | 0.00% | 0.02%  | 0.00% | 0.00%  | 0.00% |
| Proteobacteria  | Deltaproteobacteria   | Myxococcales       |                     |                  | 0.00% | 0.00% | 0.00%  | 0.15% | 0.00%  | 0.00% |
| Proteobacteria  | Deltaproteobacteria   | Myxococcales       | Haliangiaceae       |                  | 0.00% | 0.00% | 0.00%  | 0.15% | 0.00%  | 0.00% |
| Proteobacteria  | Epsilonproteobacteria | Campylobacterales  | Campylobacteraceae  |                  | 0.02% | 0.07% | 0.07%  | 0.00% | 0.00%  | 0.00% |
| Proteobacteria  | Gammaaproteobacteria  | Enterobacterales   |                     |                  | 0.00% | 0.02% | 0.00%  | 0.51% | 20.91% | 2.54% |
| Proteobacteria  | Gammaaproteobacteria  | Enterobacterales   |                     |                  | 0.15% | 0.09% | 0.02%  | 0.11% | 0.00%  | 0.00% |
| Proteobacteria  | Gammaaproteobacteria  | Enterobacterales   | Enterobacteriaceae  | Enterobacter     | 0.00% | 0.00% | 0.00%  | 0.04% | 0.00%  | 0.07% |
| Proteobacteria  | Gammaaproteobacteria  | Enterobacterales   | Enterobacteriaceae  | Serratia         | 2.58% | 0.31% | 0.00%  | 0.27% | 0.02%  | 0.00% |
| Proteobacteria  | Gammaaproteobacteria  | Pseudomonadales    | Moraxellaceae       | Acinetobacter    | 1.57% | 0.86% | 0.07%  | 0.40% | 0.07%  | 0.00% |
| Proteobacteria  | Gammaaproteobacteria  | Pseudomonadales    | Pseudomonadaceae    | Pseudomonas      | 0.46% | 0.20% | 0.07%  | 0.62% | 0.07%  | 0.07% |
| Proteobacteria  | Gammaaproteobacteria  | Xanthomonadales    | Xanthomonadaceae    |                  | 0.00% | 0.00% | 0.09%  | 0.00% | 0.00%  | 0.00% |
| Proteobacteria  | Gammaaproteobacteria  | Xanthomonadales    | Xanthomonadaceae    | Luteimonas       | 0.18% | 0.68% | 0.09%  | 0.04% | 0.00%  | 0.00% |
| Proteobacteria  | Gammaaproteobacteria  | Xanthomonadales    | Xanthomonadaceae    | Stenotrophomonas | 0.02% | 0.04% | 0.04%  | 0.22% | 0.11%  | 0.04% |
| SR1             |                       |                    |                     |                  | 0.00% | 0.04% | 0.02%  | 0.00% | 0.00%  | 0.00% |
| Spirochaetes    | Spirochaetes          | Spirochaetales     |                     |                  | 0.00% | 0.00% | 0.02%  | 0.00% | 0.00%  | 0.00% |
| Spirochaetes    | Spirochaetes          | Spirochaetales     |                     |                  | 0.00% | 0.00% | 0.02%  | 0.00% | 0.00%  | 0.00% |
| Synergistetes   | Synergistia           | Synergistales      |                     |                  | 0.00% | 0.02% | 0.11%  | 0.00% | 0.00%  | 0.00% |
| TM6             | SJA-4                 |                    |                     |                  | 0.00% | 0.04% | 0.00%  | 1.02% | 0.04%  | 0.02% |
| TM7             | TM7-3                 | CWO40              |                     |                  | 0.04% | 0.00% | 0.07%  | 0.00% | 0.00%  | 0.00% |
| TM7             | TM7-3                 | CWO40              |                     |                  | 0.00% | 0.11% | 0.29%  | 0.00% | 0.00%  | 0.00% |
| TM7             | TM7-3                 | I025               |                     |                  | 0.00% | 0.02% | 0.00%  | 0.00% | 0.00%  | 0.00% |
| Tenericutes     | CK-104-19             |                    |                     |                  | 0.02% | 0.00% | 0.00%  | 0.00% | 0.00%  | 0.00% |
| Tenericutes     | Mollicutes            | Acholeplasmatales  | Acholeplasmataceae  |                  | 0.02% | 0.02% | 0.35%  | 0.00% | 0.00%  | 0.00% |
| Tenericutes     | Mollicutes            | Acholeplasmatales  | Acholeplasmataceae  | Acholeplasma     | 0.00% | 0.00% | 0.11%  | 0.00% | 0.00%  | 0.00% |
| Tenericutes     | Mollicutes            | Anaeroplasmatales  | Anaeroplasmataceae  | Anaeroplasma     | 0.00% | 0.00% | 0.00%  | 0.00% | 0.04%  | 1.94% |
| Tenericutes     | Mollicutes            | RsaHF231           |                     |                  | 0.07% | 0.15% | 0.00%  | 0.00% | 0.00%  | 0.00% |
| Verrucomicrobia | Verrucomicrobiae      | Verrucomicrobiales | Verrucomicrobiaceae | Akkermansia      | 0.00% | 0.00% | 0.13%  | 0.00% | 0.00%  | 0.00% |
| Verrucomicrobia | Verrucomicrobiae      | Verrucomicrobiales | Verrucomicrobiaceae | Luteibacter      | 0.00% | 0.00% | 0.00%  | 0.07% | 0.00%  | 0.00% |
| WP2             |                       |                    |                     |                  | 0.00% | 0.00% | 0.00%  | 0.00% | 0.00%  | 0.00% |
| Thermi          | Deinococci            | Deinococcales      | Trueperaceae        |                  | 0.00% | 0.00% | 0.00%  | 0.24% | 0.00%  | 0.00% |
| Unassigned      |                       |                    |                     |                  | 0.04% | 0.02% | 1.90%  | 0.02% | 0.00%  | 0.15% |

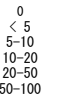

Table S5 – Statistical differences between all pairwise libraries comparisons.

| sample 1 | sample 2 | p value | p value (Bonferroni corrected) |
|----------|----------|---------|--------------------------------|
| L1976    | L1977    | 0.03    | 0.45                           |
| L1976    | L1978    | 0.00    | <=1.0e-02                      |
| L1976    | L1980    | 0.00    | <=1.0e-02                      |
| L1976    | L1981    | 0.00    | <=1.0e-02                      |
| L1976    | L1982    | 0.00    | <=1.0e-02                      |
| L1977    | L1978    | 0.00    | <=1.0e-02                      |
| L1977    | L1980    | 0.00    | <=1.0e-02                      |
| L1977    | L1981    | 0.00    | <=1.0e-02                      |
| L1977    | L1982    | 0.00    | <=1.0e-02                      |
| L1978    | L1980    | 0.00    | <=1.0e-02                      |
| L1978    | L1981    | 0.00    | <=1.0e-02                      |
| L1978    | L1982    | 0.00    | <=1.0e-02                      |
| L1980    | L1981    | 0.00    | <=1.0e-02                      |
| L1980    | L1982    | 0.00    | <=1.0e-02                      |
| L1981    | L1982    | 0.00    | <=1.0e-02                      |

Unweighted UniFrac distance matrix was used as a significance test with 999 Monte Carlo permutations.

**Table S6- Genus abundance (%) for each library. The rarefaction level was 5000 sequences/library.** (La, *Leidynea appendiculatum*; Free, Free-nematode; Hd, *Hammer Schmidella diesingi*; Tb, *Thelastoma bulhoesi*).

| Kingdom         | Phylum            | Class              | Order               | Family                   | Genus                        | <i>P. fuliginosa</i>  |                     |                           | <i>P. americana</i> |               |        |       |       |
|-----------------|-------------------|--------------------|---------------------|--------------------------|------------------------------|-----------------------|---------------------|---------------------------|---------------------|---------------|--------|-------|-------|
|                 |                   |                    |                     |                          |                              | La<br>L1978           | Free<br>L1982       | HdTb<br>L1983             | La<br>L1984         | Free<br>L1985 |        |       |       |
| Archaea         | Euryarchaeota     | Methanomicrobia    | Methanosarcinales   | Methanosarcinaceae       | Methanobrevibacter           | 0.12%                 | 0.00%               | 0.10%                     | 0.00%               | 0.50%         |        |       |       |
|                 |                   | Thermoplasta       | E2                  | Methanomassiliicoccaceae | Methanomicrococcus vandin11  | 0.00%                 | 0.00%               | 0.10%                     | 0.00%               | 0.00%         |        |       |       |
| Bacteria        | Actinobacteria    | Actinobacteria     | Actinomycetales     | Brevibacteriaceae        | Brevibacterium               | 0.72%                 | 0.60%               | 0.90%                     | 0.72%               | 0.06%         |        |       |       |
|                 |                   |                    |                     | Cellulomonadales         | Cellulomonas                 | 0.00%                 | 0.00%               | 0.00%                     | 0.00%               | 0.68%         |        |       |       |
|                 |                   |                    |                     | Corynebacteriaceae       | Corynebacterium              | 0.14%                 | 0.02%               | 0.00%                     | 0.00%               | 0.08%         |        |       |       |
|                 |                   |                    |                     | Dermabacteriaceae        | Brachybacterium              | 0.26%                 | 0.00%               | 0.00%                     | 1.18%               | 0.04%         |        |       |       |
|                 |                   |                    |                     | Dietziaceae              | Other                        | 0.00%                 | 0.02%               | 0.00%                     | 0.18%               | 0.00%         |        |       |       |
|                 |                   |                    |                     | Glycomycetaceae          | Glycomyces                   | 0.02%                 | 0.00%               | 0.02%                     | 0.18%               | 0.00%         |        |       |       |
|                 |                   |                    |                     | Gordoniaceae             | Gordonia                     | 0.24%                 | 0.00%               | 0.02%                     | 0.10%               | 0.02%         |        |       |       |
|                 |                   |                    |                     | Intrasporangiaceae       | Other                        | 0.02%                 | 0.00%               | 0.00%                     | 0.02%               | 0.00%         |        |       |       |
|                 |                   |                    |                     | Microbacteriaceae        | Other                        | 0.02%                 | 0.00%               | 0.00%                     | 0.10%               | 0.00%         |        |       |       |
|                 |                   |                    |                     |                          | Agromyces                    | 0.00%                 | 0.04%               | 0.00%                     | 0.00%               | 0.00%         |        |       |       |
|                 |                   |                    |                     |                          | Other                        | 0.02%                 | 0.00%               | 0.00%                     | 0.00%               | 0.04%         |        |       |       |
|                 |                   |                    |                     |                          | Arthrobacter                 | 0.00%                 | 0.00%               | 0.00%                     | 0.00%               | 0.02%         |        |       |       |
|                 |                   |                    |                     |                          | Mycobacterium                | 0.02%                 | 0.06%               | 0.00%                     | 0.00%               | 0.00%         |        |       |       |
|                 |                   |                    |                     |                          | Nocardioideae                | 0.04%                 | 0.00%               | 0.00%                     | 0.02%               | 0.00%         |        |       |       |
|                 |                   |                    |                     |                          | Promicromonosporaceae        | Cellulosimicrobium    | 0.04%               | 0.02%                     | 0.00%               | 0.00%         |        |       |       |
|                 |                   |                    |                     |                          | Xylanimicrobium              | 0.40%                 | 0.00%               | 0.02%                     | 0.24%               | 0.00%         |        |       |       |
|                 |                   |                    |                     |                          | Pseudonocardiae              | Pseudonocardia        | 0.06%               | 0.00%                     | 0.00%               | 0.02%         | 0.00%  |       |       |
|                 |                   |                    |                     |                          | Sanguibacteraceae            | Sanguibacter          | 0.00%               | 0.00%                     | 0.00%               | 0.48%         | 0.00%  |       |       |
|                 |                   |                    |                     |                          | Streptomycetaceae            | Streptomyces          | 0.02%               | 0.02%                     | 0.00%               | 0.10%         | 0.00%  |       |       |
|                 |                   |                    |                     |                          | Coriobacteriaceae            | Coriobacter           | 0.12%               | 0.04%                     | 0.74%               | 0.54%         | 0.64%  |       |       |
|                 |                   |                    |                     |                          |                              |                       | 3.22%               | 0.00%                     | 5.36%               | 0.00%         | 7.74%  |       |       |
|                 |                   |                    |                     | Bacteroidetes            | Bacteroidia                  | Bacteroidales         | Bacteroidaceae      | Bacteroides               | 5.46%               | 24.24%        | 12.06% | 0.00% | 4.90% |
|                 |                   |                    |                     |                          |                              |                       | GZKB19              |                           | 0.00%               | 0.00%         | 0.14%  | 0.00% | 0.00% |
|                 |                   |                    |                     |                          |                              |                       |                     | Candidatus Azobacteroides | 4.80%               | 0.00%         | 1.92%  | 0.00% | 1.80% |
|                 |                   |                    |                     |                          |                              |                       |                     | Dysgonomonas              | 7.46%               | 5.42%         | 0.36%  | 2.22% | 1.78% |
|                 |                   |                    |                     |                          |                              |                       |                     | Parabacteroides           | 2.46%               | 0.00%         | 0.00%  | 0.00% | 0.00% |
|                 |                   |                    |                     |                          |                              |                       |                     | Tannerella                | 5.22%               | 0.00%         | 12.98% | 0.00% | 4.60% |
|                 | Rikenellaceae     | Rikenella          | 1.70%               |                          |                              |                       | 0.00%               | 0.02%                     | 0.00%               | 0.60%         |        |       |       |
|                 |                   |                    | 5.78%               |                          |                              |                       | 1.10%               | 1.80%                     | 0.00%               | 8.18%         |        |       |       |
|                 |                   |                    | 0.10%               |                          |                              |                       | 0.00%               | 0.20%                     | 0.00%               | 0.30%         |        |       |       |
|                 |                   |                    | 0.06%               |                          |                              |                       | 0.00%               | 1.16%                     | 0.00%               | 1.58%         |        |       |       |
|                 |                   |                    | 1.78%               |                          |                              |                       | 0.00%               | 6.22%                     | 0.00%               | 1.14%         |        |       |       |
|                 | Cytophagia        | Cytophagales       | Cytophagaceae       |                          |                              |                       |                     | 0.02%                     | 0.00%               | 0.52%         | 0.00%  |       |       |
|                 |                   |                    |                     |                          |                              |                       | 0.00%               | 0.00%                     | 0.00%               | 0.34%         | 0.00%  |       |       |
|                 | Flavobacteriia    | Flavobacteriales   | Flavobacteriaceae   |                          |                              |                       |                     | 0.00%                     | 0.04%               | 0.00%         | 0.08%  |       |       |
|                 |                   |                    |                     |                          |                              |                       | 0.00%               | 0.00%                     | 0.00%               | 0.00%         | 0.06%  |       |       |
|                 |                   |                    |                     |                          |                              |                       | 0.04%               | 0.00%                     | 0.12%               | 0.00%         | 0.00%  |       |       |
|                 |                   |                    |                     |                          |                              |                       | 0.00%               | 0.00%                     | 0.00%               | 0.14%         | 0.00%  |       |       |
|                 | Sphingobacteriia  | Sphingobacteriales | Sphingobacteriaceae |                          |                              |                       | Sphingobacterium    | 0.06%                     | 0.02%               | 0.02%         | 0.32%  | 0.00% |       |
|                 |                   |                    |                     |                          |                              |                       | 0.04%               | 0.02%                     | 0.04%               | 0.28%         | 0.02%  |       |       |
| Chloroflexi     | Saprosirae        | Saprosirales       | Chitinophagaceae    |                          | 0.10%                        | 0.00%                 | 0.02%               | 1.32%                     | 0.00%               |               |        |       |       |
| Deferribacteres | Thermomicrobia    | JG30-KF-OM45       |                     |                          | 0.02%                        | 0.02%                 | 0.00%               | 0.06%                     | 0.00%               |               |        |       |       |
| Firmicutes      | Bacilli           | Bacillales         | Deferribacteres     | Deferribacteraceae       | Mucispirillum                | 0.64%                 | 0.00%               | 0.22%                     | 0.00%               | 1.02%         |        |       |       |
|                 |                   |                    | Bacillaceae         |                          | 0.00%                        | 0.00%                 | 0.00%               | 0.10%                     | 0.00%               |               |        |       |       |
|                 |                   |                    | Planococcaceae      | Lysinibacillus           | 0.10%                        | 0.02%                 | 0.00%               | 0.00%                     | 0.00%               |               |        |       |       |
|                 |                   |                    | Staphylococcaceae   | Staphylococcus           | 0.40%                        | 0.92%                 | 0.00%               | 0.02%                     | 1.84%               |               |        |       |       |
|                 |                   |                    | Lactobacillales     | Enterococcaceae          | Enterococcus                 | 1.32%                 | 1.38%               | 0.28%                     | 2.08%               | 6.20%         |        |       |       |
|                 |                   |                    |                     | Lactobacillaceae         | Other                        | 0.82%                 | 4.08%               | 0.52%                     | 5.32%               | 1.74%         |        |       |       |
|                 |                   |                    |                     |                          |                              | 1.32%                 | 0.00%               | 0.00%                     | 0.00%               | 0.00%         |        |       |       |
|                 |                   |                    |                     |                          |                              | 1.14%                 | 2.04%               | 0.56%                     | 1.16%               | 2.64%         |        |       |       |
|                 |                   |                    |                     |                          |                              | 2.70%                 | 4.20%               | 6.56%                     | 4.48%               | 3.76%         |        |       |       |
|                 |                   |                    |                     |                          |                              | 3.48%                 | 5.52%               | 3.24%                     | 5.12%               | 4.64%         |        |       |       |
|                 |                   |                    |                     |                          |                              |                       |                     |                           |                     |               |        |       |       |
|                 |                   |                    |                     |                          |                              |                       |                     |                           |                     |               |        |       |       |
|                 |                   |                    |                     |                          |                              |                       |                     |                           |                     |               |        |       |       |
| Bacteria        | Firmicutes        | Clostridia         | Clostridiales       | Christensenellaceae      | Christensenella              | 0.00%                 | 0.00%               | 0.10%                     | 0.54%               | 0.04%         |        |       |       |
|                 |                   |                    |                     |                          | Other                        | 0.28%                 | 1.06%               | 0.10%                     | 0.20%               | 0.00%         |        |       |       |
|                 |                   |                    |                     | Clostridiaceae           | Clostridium                  | 0.00%                 | 0.00%               | 0.04%                     | 0.00%               | 0.04%         |        |       |       |
|                 |                   |                    |                     | Dehalobacteriaceae       | Dehalobacterium              | 0.00%                 | 0.04%               | 0.04%                     | 0.00%               | 0.00%         |        |       |       |
|                 |                   |                    |                     | Dehalobacteriaceae       | Dehalobacterium              | 0.10%                 | 0.08%               | 0.16%                     | 0.10%               | 0.10%         |        |       |       |
|                 |                   |                    |                     | Eubacteriaceae           | Anaerofustis                 | 0.00%                 | 0.00%               | 0.02%                     | 0.00%               | 0.02%         |        |       |       |
|                 |                   |                    |                     | Eubacteriaceae           | Pseudoramibacter_Eubacterium | 0.00%                 | 0.00%               | 0.80%                     | 0.00%               | 0.00%         |        |       |       |
|                 |                   |                    |                     |                          | Other                        | 0.36%                 | 0.20%               | 0.20%                     | 0.54%               | 0.00%         |        |       |       |
|                 |                   |                    |                     | Lachnospiraceae          | Anaerostipes                 | 2.30%                 | 10.68%              | 4.20%                     | 7.42%               | 2.54%         |        |       |       |
|                 |                   |                    |                     |                          | Coprococcus                  | 0.22%                 | 0.18%               | 0.38%                     | 0.40%               | 0.32%         |        |       |       |
|                 |                   |                    |                     |                          | Other                        | 0.06%                 | 0.02%               | 1.06%                     | 0.16%               | 0.04%         |        |       |       |
|                 |                   |                    |                     |                          |                              | 0.12%                 | 0.02%               | 0.00%                     | 0.12%               | 0.06%         |        |       |       |
|                 |                   |                    |                     |                          |                              | 6.14%                 | 15.82%              | 8.32%                     | 21.10%              | 10.04%        |        |       |       |
|                 |                   |                    |                     |                          |                              | 0.14%                 | 0.36%               | 0.02%                     | 0.00%               | 0.30%         |        |       |       |
|                 |                   |                    |                     |                          |                              | 0.72%                 | 4.60%               | 1.28%                     | 9.38%               | 1.14%         |        |       |       |
|                 |                   |                    |                     |                          |                              | 0.50%                 | 2.16%               | 0.20%                     | 3.14%               | 0.66%         |        |       |       |
|                 |                   |                    |                     |                          |                              | 0.88%                 | 0.00%               | 0.32%                     | 0.00%               | 0.36%         |        |       |       |
|                 |                   |                    |                     |                          | Veillonellaceae              | Phascolarctobacterium | 0.00%               | 0.00%                     | 0.48%               | 0.00%         | 0.00%  |       |       |
|                 |                   |                    |                     |                          |                              | Other                 | 0.00%               | 0.00%                     | 0.00%               | 0.00%         | 0.02%  |       |       |
|                 |                   |                    |                     |                          |                              |                       | 0.16%               | 0.10%                     | 0.94%               | 0.18%         | 0.16%  |       |       |
|                 |                   |                    |                     |                          |                              |                       | 0.04%               | 0.06%                     | 0.26%               | 0.10%         | 0.12%  |       |       |
|                 |                   |                    |                     |                          |                              |                       | 0.04%               | 0.30%                     | 1.16%               | 0.00%         | 0.02%  |       |       |
|                 |                   |                    |                     |                          | Erysipelotrichi              | Erysipelotrichales    | Erysipelotrichaceae |                           | 1.20%               | 3.42%         | 3.88%  | 1.56% | 0.50% |
|                 |                   |                    |                     | Fusobacteriia            | Fusobacteriia                | Fusobacteriales       | Fusobacteriaceae    | Other                     | 0.22%               | 0.00%         | 0.06%  | 0.00% | 0.00% |
|                 |                   |                    |                     |                          |                              |                       |                     | Fusobacterium             | 3.14%               | 0.00%         | 0.32%  | 0.00% | 0.96% |
|                 |                   |                    |                     | GN02                     | BD-1                         |                       |                     |                           | 0.14%               | 0.00%         | 0.00%  | 0.00% | 0.00% |
|                 |                   |                    |                     | Planctomycetes           | Planctomycetia               | Planctomycetales      | Pirellulales        | Pirellulaceae             |                     | 0.04%         | 0.00%  | 0.04% | 0.00% |
| vadinHA49       | Planctomycetaceae |                    | 0.00%               |                          |                              |                       | 0.02%               | 0.00%                     | 0.02%               | 0.00%         |        |       |       |
|                 |                   |                    |                     |                          | 1.84%                        | 0.00%                 | 0.62%               | 0.00%                     | 1.36%               |               |        |       |       |
|                 |                   |                    |                     |                          | 0.00%                        | 0.00%                 | 0.00%               | 0.02%                     | 0.00%               |               |        |       |       |
|                 |                   |                    |                     |                          | 0.00%                        | 0.00%                 | 0.00%               | 1.52%                     | 0.00%               |               |        |       |       |
|                 |                   |                    |                     |                          | 0.10%                        | 0.00%                 | 0.00%               | 0.06%                     | 0.00%               |               |        |       |       |
|                 |                   |                    |                     |                          | 0.86%                        | 0.00%                 | 0.00%               | 0.00%                     | 0.14%               |               |        |       |       |
|                 |                   |                    |                     |                          | 0.00%                        | 0.00%                 | 0.00%               | 0.20%                     | 0.02%               |               |        |       |       |
|                 |                   |                    |                     |                          | 0.00%                        | 0.04%                 | 0.00%               | 0.40%                     | 0.10%               |               |        |       |       |
|                 |                   |                    |                     |                          | 0.04%                        | 0.00%                 | 0.00%               | 1.82%                     | 0.00%               |               |        |       |       |
|                 |                   |                    |                     |                          | 0.04%                        | 0.02%                 | 0.00%               | 0.10%                     | 0.02%               |               |        |       |       |
|                 |                   |                    |                     |                          | 0.00%                        | 0.04%                 | 0.00%               | 0.10%                     | 0.00%               |               |        |       |       |
|                 |                   |                    |                     |                          | 0.00%                        | 0.06%                 | 0.00%               | 0.00%                     | 0.00%               |               |        |       |       |
|                 |                   |                    |                     |                          | 0.02%                        | 0.00%                 | 0.00%               | 0.00%                     | 0.00%               |               |        |       |       |
|                 |                   |                    |                     |                          | 0.00%                        | 0.00%                 | 0.00%               | 0.06%                     | 0.00%               |               |        |       |       |
|                 |                   |                    |                     |                          | 0.02%                        | 0.00%                 | 0.32%               | 0.02%                     | 0.00%               |               |        |       |       |
|                 |                   |                    |                     |                          | 0.00%                        | 0.00%                 | 0.00%               | 0.00%                     | 0.00%               |               |        |       |       |
|                 |                   |                    |                     |                          | 0.02%                        | 0.06%                 | 0.00%               | 0.10%                     | 0.06%               |               |        |       |       |
|                 |                   |                    |                     |                          | 0.00%                        | 0.00%                 | 0.00%               | 0.04%                     | 0.00%               |               |        |       |       |
|                 |                   |                    |                     |                          | 0.04%                        | 0.02%                 | 0.00%               | 0.04%                     | 0.00%               |               |        |       |       |
|                 |                   |                    |                     |                          | 0.20%                        | 0.00%                 | 0.00%               | 0.00%                     | 5.76%               |               |        |       |       |
|                 |                   |                    |                     |                          | 0.08%                        | 0.00%                 | 0.08%               | 0.00%                     | 0.20%               |               |        |       |       |
|                 |                   |                    |                     |                          | 0.00%                        | 0.00%                 | 0.04%               | 0.00%                     | 0.00%               |               |        |       |       |
|                 |                   |                    |                     |                          | 0.14%                        | 0.00%                 | 0.00%               | 0.00%                     | 0.00%               |               |        |       |       |
|                 |                   |                    |                     |                          | 3.32%                        | 0.00%                 | 0.26%               | 0.00%                     | 1.16%               |               |        |       |       |
|                 |                   |                    |                     |                          | 0.00%                        | 0.00%                 | 0.04%               | 0.00%                     | 0.04%               |               |        |       |       |
|                 |                   |                    |                     |                          | 1.30%                        | 0.00%                 | 0.86%               | 0.00%                     | 2.30%               |               |        |       |       |
|                 |                   |                    |                     |                          | 0.00%                        | 0.00%                 | 0.80%               | 0.00%                     | 0.00%               |               |        |       |       |
|                 |                   |                    |                     |                          | 0.86%                        | 0.00%                 | 0.42%               | 0.00%                     | 0.56%               |               |        |       |       |
|                 |                   |                    |                     |                          | 19.14%                       | 6.20%                 | 7.74%               | 11.58%                    | 6.84%               |               |        |       |       |
|                 |                   |                    |                     |                          | 0.00%                        | 0.00%                 | 0.00%               | 0.00%                     | 0.00%               |               |        |       |       |
|                 |                   |                    |                     |                          | 0.16%                        | 0.00%                 | 0.54%               | 0.00%                     | 0.00%               |               |        |       |       |
|                 |                   |                    |                     |                          | 0.00%                        | 0.00%                 | 0.02%               | 0.00%                     | 0.00%               |               |        |       |       |
|                 |                   |                    |                     |                          | 0.00%                        | 2.62%                 | 0.00%               | 5.72%                     | 0.26%               |               |        |       |       |
|                 |                   |                    |                     |                          | 0.00%                        | 0.00%                 | 0.12%               | 0.22%                     | 0.06%               |               |        |       |       |
|                 |                   |                    |                     |                          | 0.00%                        | 0.04%                 | 0.00%               | 0.00%                     | 0.00%               |               |        |       |       |
|                 |                   |                    |                     |                          | 0.00%                        | 0.00%                 | 0.00%               | 0.20%                     | 0.00%               |               |        |       |       |
|                 |                   |                    |                     |                          | 0.10%                        | 0.00%                 | 0.00%               | 0.02%                     | 0.00%               |               |        |       |       |
|                 |                   |                    |                     |                          | 0.00%                        | 0.00%                 | 0.00%               | 0.00%                     | 0.06%               |               |        |       |       |
|                 |                   |                    |                     |                          | 0.10%                        | 0.02%                 | 0.00%               | 0.20%                     | 0.00%               |               |        |       |       |
|                 |                   |                    |                     |                          | 0.10%                        | 0.00%                 | 0.00%               | 0.00%                     | 0.00%               |               |        |       |       |
|                 |                   |                    |                     |                          | 0.14%                        | 0.00%                 | 0.02%               | 0.36%                     | 0.00%               |               |        |       |       |
|                 |                   |                    |                     |                          | 0.00%                        | 0.00%                 | 0.00%               | 0.84%                     | 0.00%               |               |        |       |       |
|                 |                   |                    |                     |                          | 0.02%                        | 0.04%                 | 0.00%               | 0.00%                     | 0.00%               |               |        |       |       |

|                 |                  |                    |                         |                     |       |       |       |       |       |  |
|-----------------|------------------|--------------------|-------------------------|---------------------|-------|-------|-------|-------|-------|--|
| SR1             |                  |                    |                         |                     | 0.04% | 0.00% | 0.00% | 0.00% | 1.42% |  |
| Spirochaetes    | Spirochaetes     | Spirochaetales     | Spirochaetaceae         | Treponema           | 0.02% | 0.00% | 0.22% | 0.00% | 0.06% |  |
|                 |                  |                    |                         |                     | 0.06% | 0.00% | 0.02% | 0.00% | 0.08% |  |
| Synergistetes   | Synergistia      | Synergistales      | Dethiosulfovibrionaceae | TGS                 | 0.10% | 0.00% | 0.12% | 0.00% | 0.20% |  |
|                 |                  |                    | Synergistaceae          | Candidatus Tammella | 0.04% | 0.00% | 0.00% | 0.00% | 0.06% |  |
|                 |                  |                    |                         | vadinCA02           | 0.02% | 0.00% | 0.46% | 0.00% | 0.06% |  |
| TM7             | TM7-3            | CW040              | F16                     |                     | 0.02% | 0.00% | 0.12% | 0.00% | 2.68% |  |
|                 |                  | I025               | Other                   |                     | 0.00% | 0.00% | 0.04% | 0.00% | 0.00% |  |
| Tenericutes     | CK-104-19        |                    |                         |                     | 0.00% | 0.00% | 0.06% | 0.00% | 0.00% |  |
|                 |                  |                    |                         |                     | 0.36% | 0.00% | 0.06% | 0.00% | 0.00% |  |
|                 | Mollicutes       | Acholeplasmatales  | Acholeplasmataceae      | Acholeplasma        | 0.14% | 0.00% | 0.12% | 0.00% | 0.00% |  |
|                 |                  |                    |                         | Anaeroplasma        | 0.00% | 1.74% | 0.00% | 0.64% | 0.00% |  |
|                 |                  | RsaHF231           |                         |                     | 0.02% | 0.00% | 0.06% | 0.00% | 0.06% |  |
| Verrucomicrobia | Opitutae         | Opitutales         | Opitutaceae             | Opitutus            | 0.00% | 0.00% | 0.06% | 0.00% | 0.14% |  |
|                 |                  |                    |                         | Akkermansia         | 0.08% | 0.00% | 0.00% | 0.26% | 0.12% |  |
|                 | Verrucomicrobiae | Verrucomicrobiales | Verrucomicrobiaceae     | Luteolibacter       | 0.00% | 0.00% | 0.00% | 0.18% | 0.00% |  |
| WPS-2           |                  |                    |                         |                     | 0.00% | 0.00% | 0.10% | 0.56% | 0.00% |  |
| Unassigned      |                  |                    |                         |                     | 1.86% | 0.12% | 1.20% | 1.54% | 0.84% |  |

0  
< 5  
5-10  
10-20  
20-50  
50-100

The rarefaction level was 5,000 sequences in each library. (La. *Leidynema appendiculatum*; Free, nematode-free; Hd, *Hammerschmidtella diesingi*; Tb, *Thelastoma bulhoesi*).



Table S7 – Statistical differences between all pairwise libraries comparisons.

| sample 1 | sample 2 | p value | p value (Bonferroni corrected) |
|----------|----------|---------|--------------------------------|
| L1978    | L1982    | 0.00    | <=1.0e-02                      |
| L1978    | L1983    | 0.00    | <=1.0e-02                      |
| L1978    | L1984    | 0.00    | <=1.0e-02                      |
| L1978    | L1985    | 0.02    | 0.2                            |
| L1982    | L1983    | 0.00    | <=1.0e-02                      |
| L1982    | L1984    | 0.00    | <=1.0e-02                      |
| L1982    | L1985    | 0.00    | <=1.0e-02                      |
| L1983    | L1984    | 0.00    | <=1.0e-02                      |
| L1983    | L1985    | 0.05    | 0.5                            |
| L1984    | L1985    | 0.00    | <=1.0e-02                      |

Unweighted UniFrac distance matrix was used as a significance test with 999 Monte Carlo permutations.

### Supplemental Figures legends

**Fig. S1.** Rarefaction curves based on observed OTUs in each sequence and sample. (A)

The rarefaction level was 4,528 sequences in each library, filtering the genus

*Blattabacterium*; (B) The rarefaction level was 5,000 sequences in each library, filtering

the genus *Blattabacterium*.

# S1 Figure

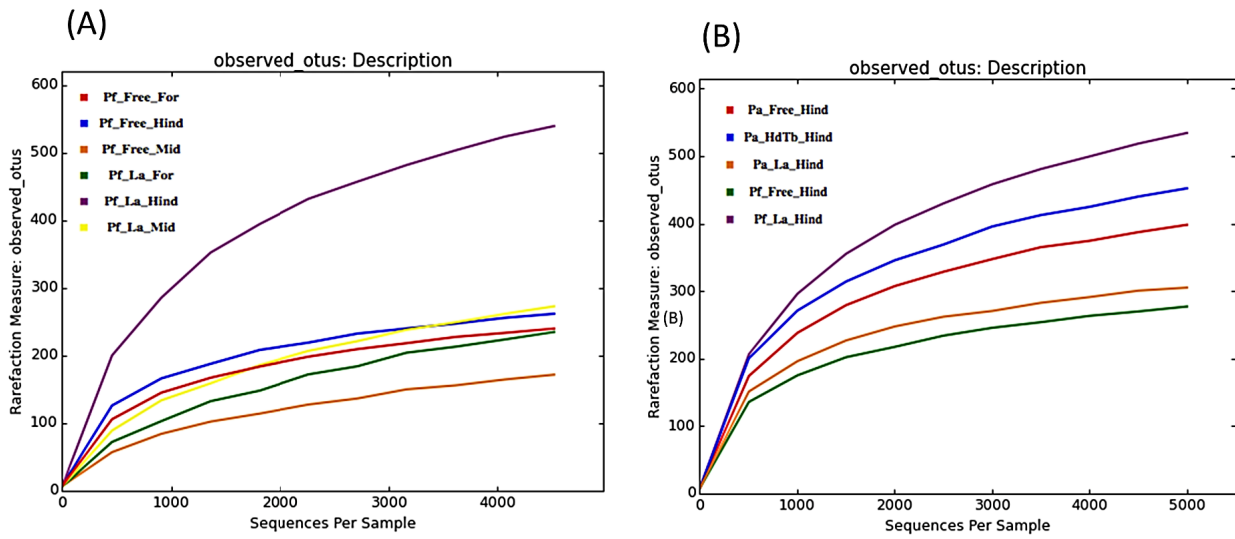

Fig. S1, Vicente
